# Supplementary material for: Fine mapping of a Phytophthora-resistance locus RpsGZ in soybean using genotyping-by-sequencing
Source: PubMed Central journal article supplement (PMC7126358; doi:10.1186/s12864-020-6668-z), 2020-04-03
Supplement: 12864_2020_6668_MOESM1_ESM.pdf [file 12864_2020_6668_MOESM1_ESM.pdf]

Table S1 Gene ontology (GO) enrichment analysis of the candidate genes

| Ontology              | GO ID      | GO Term                       | Genes                                                                                                                        |
|-----------------------|------------|-------------------------------|------------------------------------------------------------------------------------------------------------------------------|
| Molecular<br>function | GO:0009987 | cellular process              | <i>Glyma.03G036200, Glyma.03G035100, Glyma.03G035300, Glyma.03G036000</i>                                                    |
|                       | GO:0030554 | adenyl nucleotide binding     | <i>Glyma.03G034900, Glyma.03G034800, Glyma.03G035300, Glyma.03G034400, Glyma.03G036000, Glyma.03G034500</i>                  |
|                       | GO:0032553 | ribonucleotide binding        | <i>Glyma.03G034900, Glyma.03G034800, Glyma.03G035300, Glyma.03G034400, Glyma.03G036000</i>                                   |
|                       | GO:0032559 | adenyl ribonucleotide binding | <i>Glyma.03G034900, Glyma.03G034800, Glyma.03G035300, Glyma.03G034400, Glyma.03G036000, Glyma.03G034500</i>                  |
|                       | GO:0032555 | purine ribonucleotide binding | <i>Glyma.03G034900, Glyma.03G034800, Glyma.03G035300, Glyma.03G034400, Glyma.03G036000, Glyma.03G034500</i>                  |
|                       | GO:0001883 | purine nucleoside binding     | <i>Glyma.03G034900, Glyma.03G034800, Glyma.03G035300, Glyma.03G034400, Glyma.03G036000, Glyma.03G034500</i>                  |
|                       | GO:0001882 | nucleoside binding            | <i>Glyma.03G034900, Glyma.03G034800, Glyma.03G035300, Glyma.03G034400, Glyma.03G036000, Glyma.03G034500</i>                  |
|                       | GO:0017076 | purine nucleotide binding     | <i>Glyma.03G034900, Glyma.03G034800, Glyma.03G035300, Glyma.03G034400, Glyma.03G036000</i>                                   |
|                       | GO:0000166 | nucleotide binding            | <i>Glyma.03G034900, Glyma.03G034800, Glyma.03G035300, Glyma.03G034400, Glyma.03G036000, Glyma.03G034500</i>                  |
|                       | GO:0005488 | binding                       | <i>Glyma.03G034800, Glyma.03G034900, Glyma.03G035300, Glyma.03G034400, Glyma.03G035200, Glyma.03G036000, Glyma.03G034500</i> |

Table S2 The biological process and molecular function ontology of the candidate genes

| Genes                  | GO terms                                                                                                                                      |
|------------------------|-----------------------------------------------------------------------------------------------------------------------------------------------|
| <i>Glyma.03G034400</i> | GO:0043531 ADP binding                                                                                                                        |
| <i>Glyma.03G034500</i> | GO:0043531 ADP binding                                                                                                                        |
| <i>Glyma.03G034800</i> | GO:0005515 protein binding<br>GO:0043531 ADP binding                                                                                          |
| <i>Glyma.03G034900</i> | GO:0005515 protein binding<br>GO:0043531 ADP binding                                                                                          |
| <i>Glyma.03G035100</i> | GO:0003678 DNA helicase activity<br>GO:0000723 telomere maintenance<br>GO:0006281 DNA repair                                                  |
| <i>Glyma.03G035200</i> | GO:0008270 zinc ion binding<br>GO:0003677 DNA binding                                                                                         |
| <i>Glyma.03G035300</i> | GO:0006468 protein amino acid phosphorylation<br>GO:0005524 ATP binding<br>GO:0004672 protein kinase activity                                 |
| <i>Glyma.03G036000</i> | GO:0006468 protein amino acid phosphorylation<br>GO:0005524 ATP binding<br>GO:0004672 protein kinase activity                                 |
| <i>Glyma.03G036200</i> | GO:0015297 antiporter activity<br>GO:0016020 membrane<br>GO:0006855 multidrug transport<br>GO:0015238 drug transmembrane transporter activity |

Table S3 Primers of the candidate genes for real-time PCR

| Gene ID                | Upstream primers        | ownstream primers       | Tm( °C) |
|------------------------|-------------------------|-------------------------|---------|
| <i>Glyma.03G034400</i> | TGGCATCAAGTCCTTCCCTAA   | GTGAGATGGAGAAGCCCTGTG   | 58      |
| <i>Glyma.03G034500</i> | TGTCATTTCCAGGTGGTCGTT   | AAGCAGGATCTCCTTCTGGTCTC | 59      |
| <i>Glyma.03G034800</i> | GATCTAGCCACATCACTCGG    | ATGATACATCGTGCCTCCTC    | 54      |
| <i>Glyma.03G034900</i> | ATTAAGGGATTGCTCGTCAG    | CTCGGAGATTTGGAAAGGTA    | 54      |
| <i>Glyma.03G035300</i> | TTTCAGCAGCCAACATACAGATT | CTGACAGGTTTCCAACAGCACAT | 58      |
| <i>Glyma.03G035900</i> | CAGATTACAGTCGGACGTAGGC  | GATGAAGGATTTTCGGAAGAGA  | 56      |
| <i>Glyma.03G036000</i> | AAGATCCTAACATGAGACCAAGC | AGAAAACAAGTGCCGAATAAACG | 56      |
| <i>Actin</i>           | CGGTGGTTCTATCTTGGCATC   | GTCTTTCGCTTCAATAACCCTA  | 55      |
