# Supplementary material for: Fine mapping of a Phytophthora-resistance locus RpsGZ in soybean using genotyping-by-sequencing
Source: PubMed Central journal article supplement (PMC7126358; doi:10.1186/s12864-020-6668-z), 2020-04-03

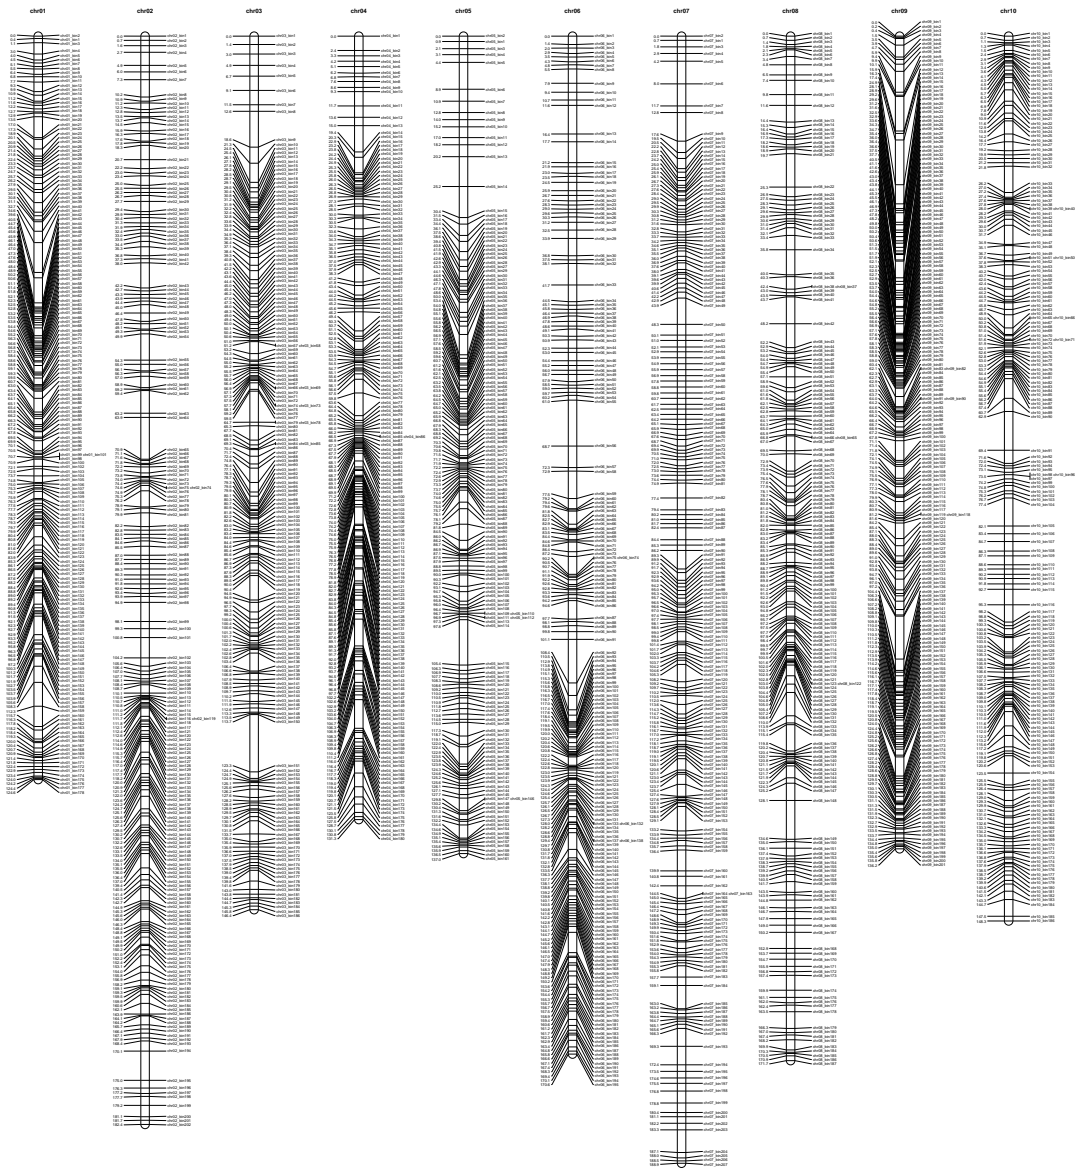

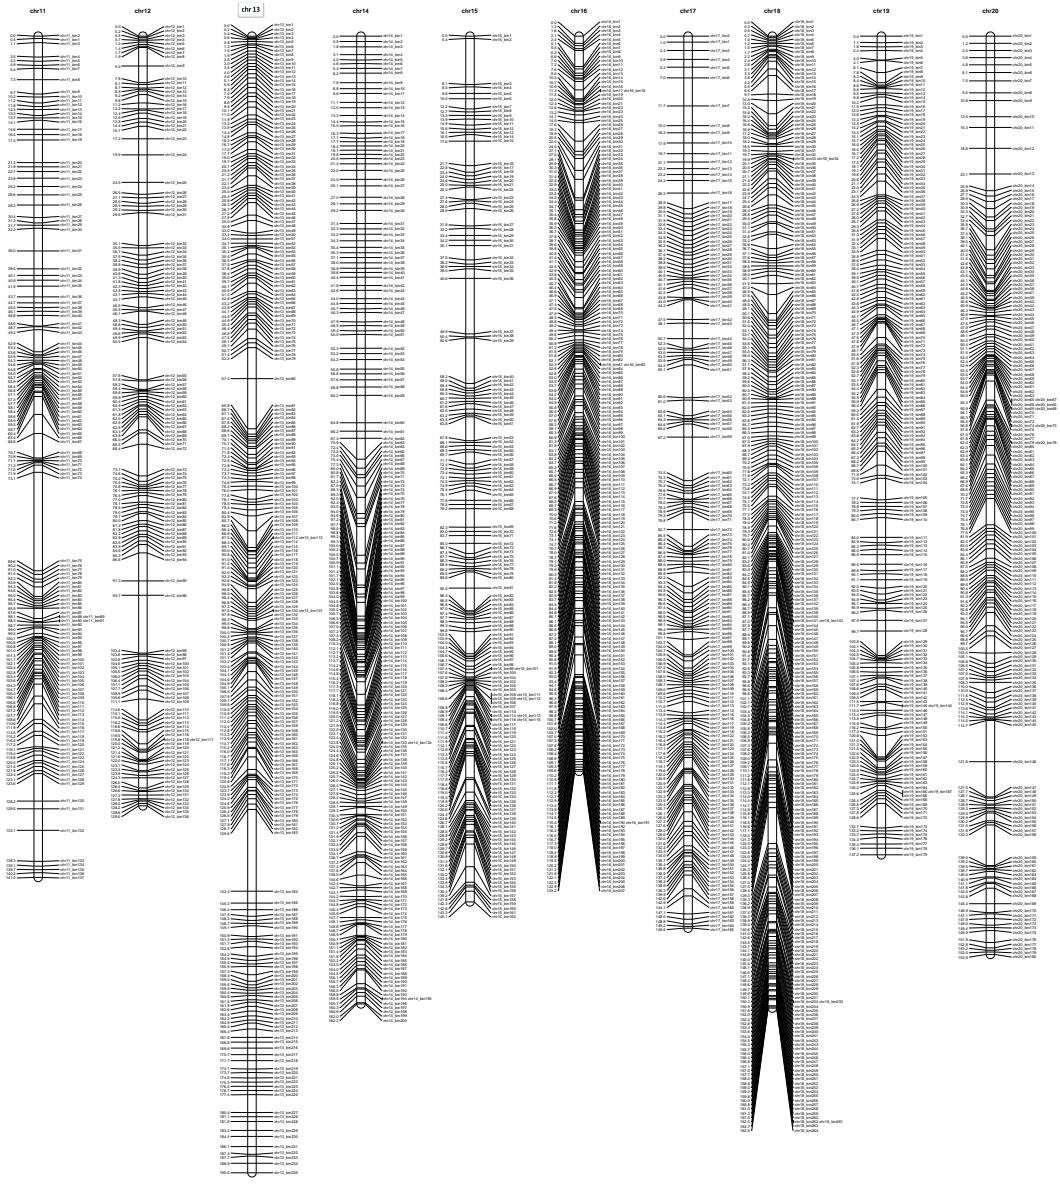

Supplement: 12864_2020_6668_MOESM2_ESM.pdf [file 12864_2020_6668_MOESM2_ESM.pdf]
