# Supplementary material for: Fine mapping of a Phytophthora-resistance locus RpsGZ in soybean using genotyping-by-sequencing
Source: PubMed Central journal article supplement (PMC7126358; doi:10.1186/s12864-020-6668-z), 2020-04-03

Significance levels and Arrow types Diagram

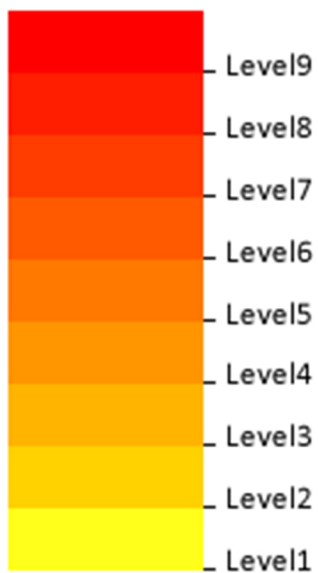

- is\_a
- part\_of
- positive\_regulate
- regulate
- negative\_regulate
- two significant nodes
- one significant node

GO:0003674  
molecular\_function

GO:0005488  
binding

GO:0000166 (0.00168)  
nucleotide binding  
7/10 | 5459/29501

GO:0001882 (0.00107)  
nucleoside binding  
7/10 | 4747/29501

GO:0032553 (0.00107)  
ribonucleotide binding  
7/10 | 4867/29501

GO:0017076 (0.00137)  
purine nucleotide  
binding  
7/10 | 5181/29501

GO:0001883 (0.00107)  
purine nucleoside  
binding  
7/10 | 4745/29501

GO:0032555 (0.00107)  
purine ribonucleotide  
binding  
7/10 | 4867/29501

GO:0030554 (0.00107)  
adenyl nucleotide  
binding  
7/10 | 4745/29501

GO:0032559 (0.00107)  
adenyl ribonucleotide  
binding  
7/10 | 4442/29501

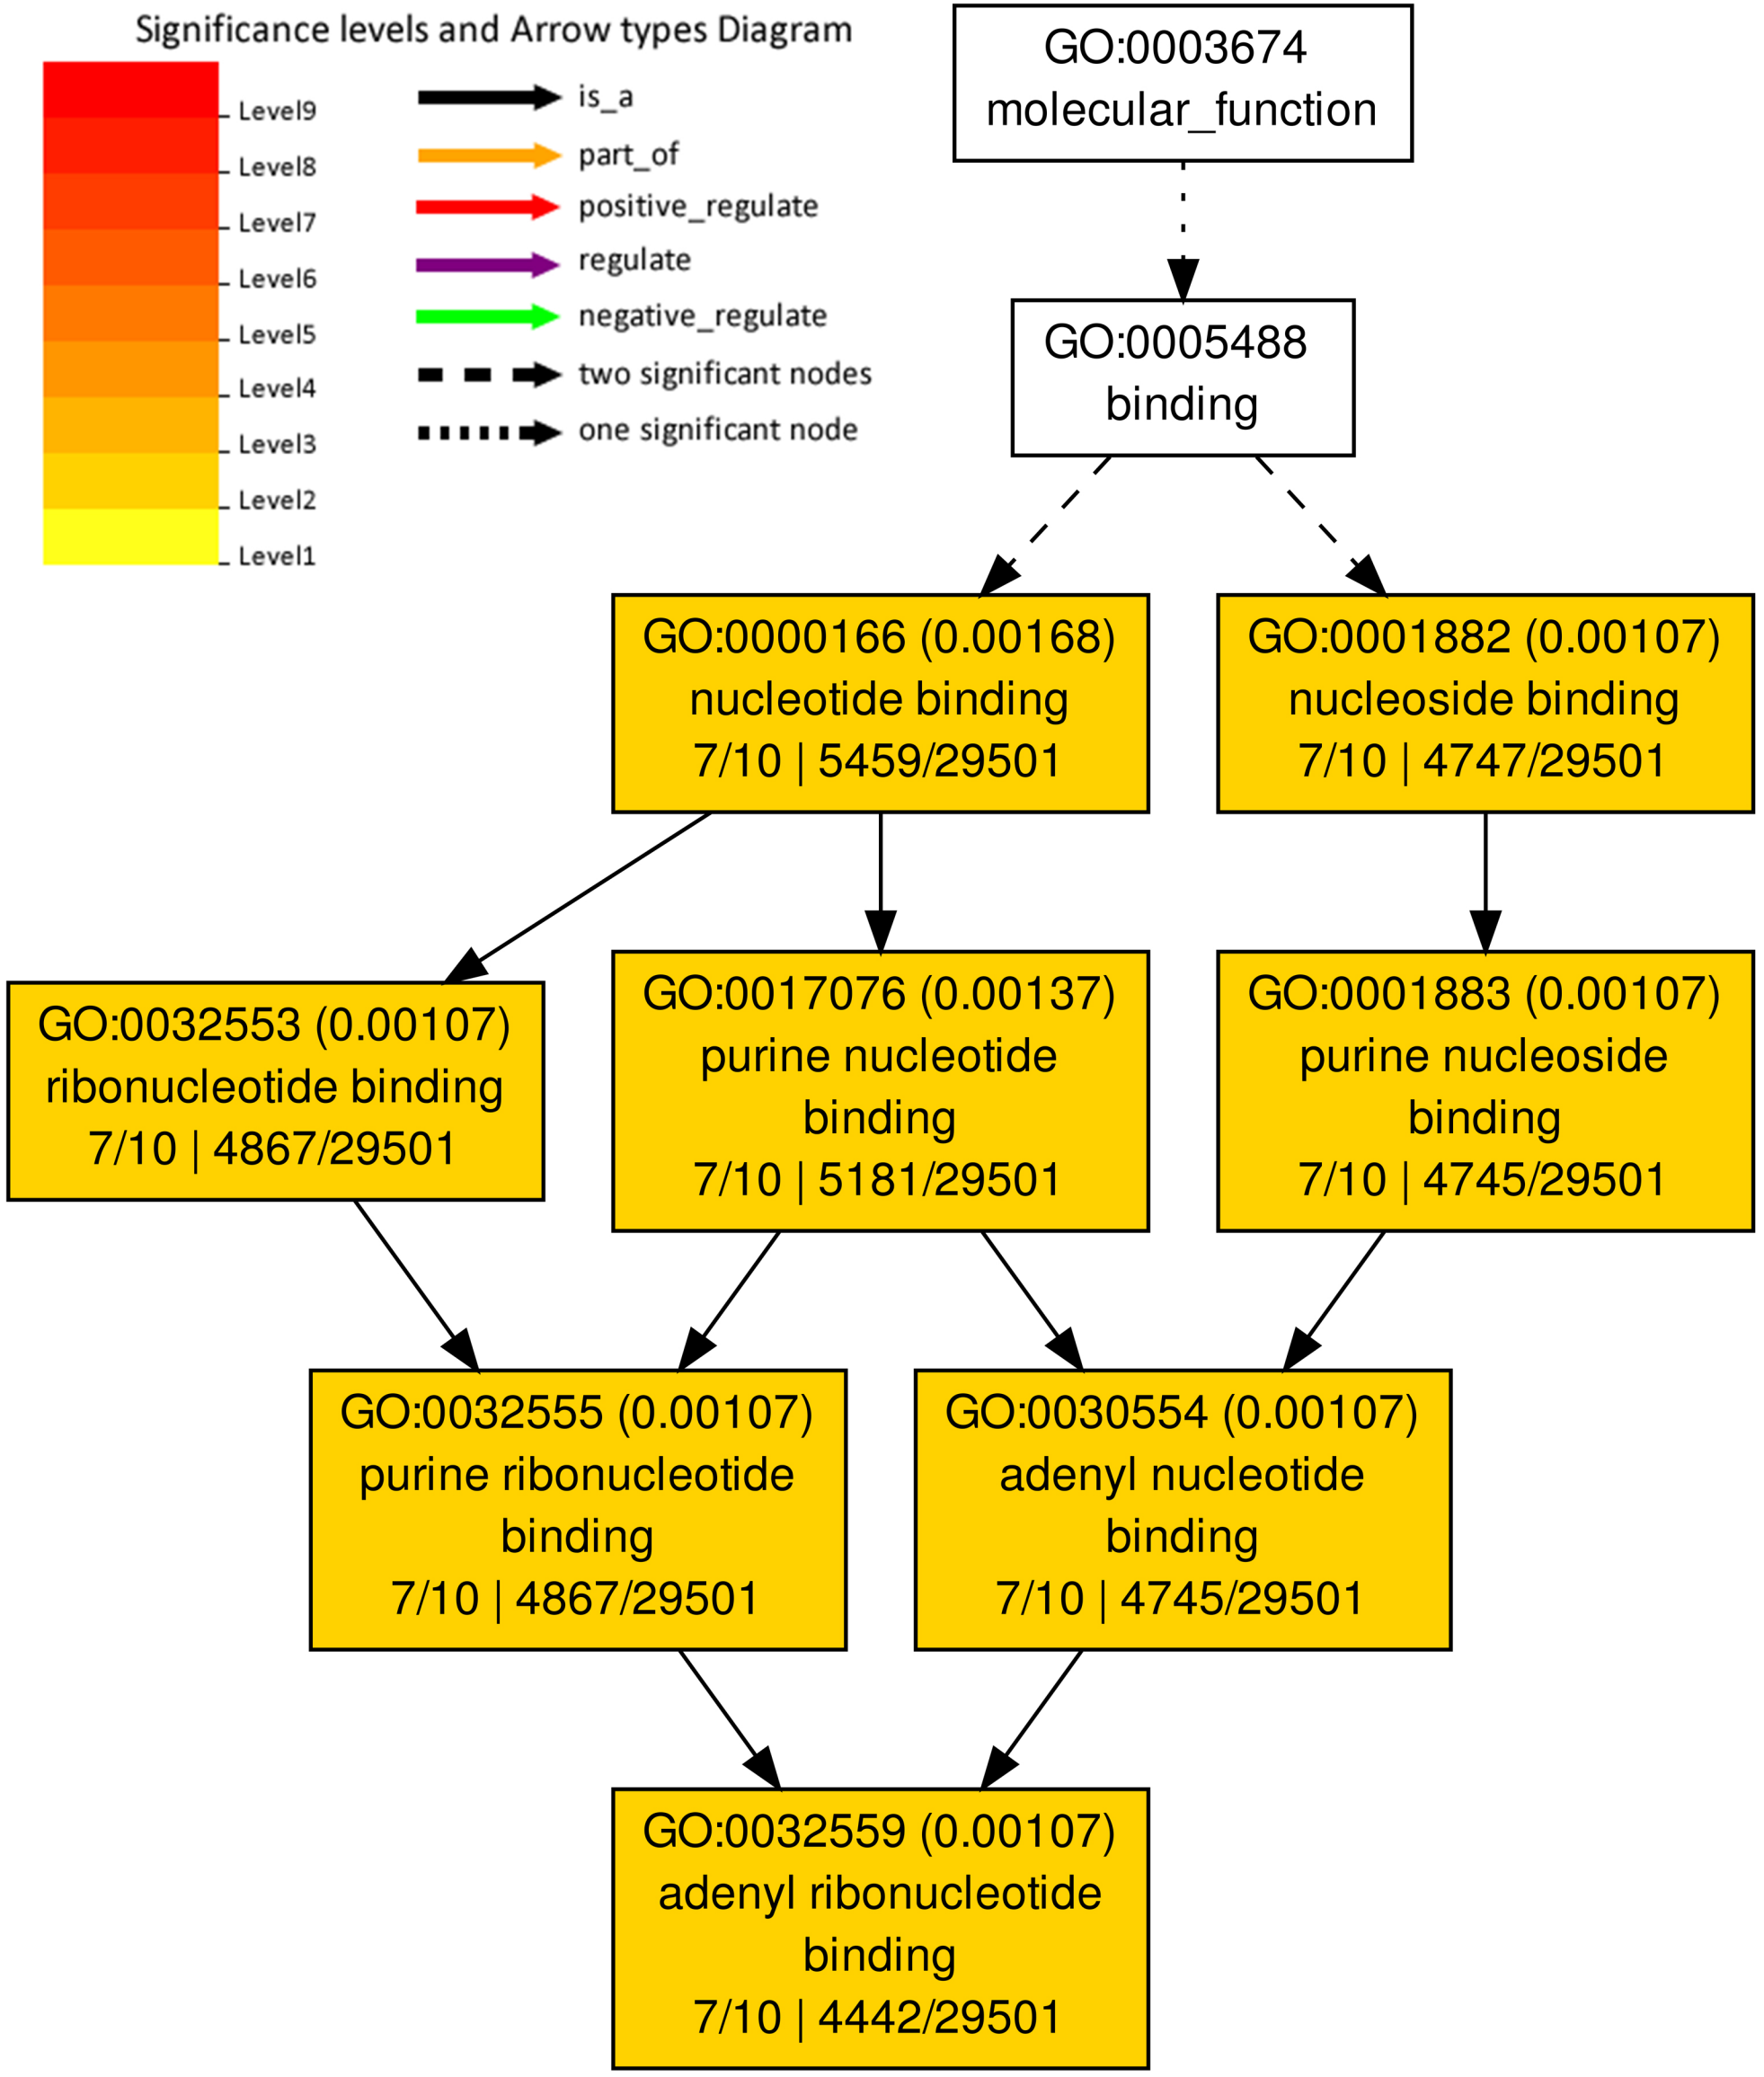

Supplement: 12864_2020_6668_MOESM3_ESM.pdf [file 12864_2020_6668_MOESM3_ESM.pdf]
